# Supplementary material for: Structural Effects of Microcrystalline Cellulose-Derived Carbon Supports on Catalytic Performance of the Pd(OH)2/C Catalysts for the Hydrogenolytic Debenzylation of Hexanitrohexaazaisowurtzitane Derivatives
Source: MDPI journal article supplement (doi:10.3390/catal13030637), 2023-03-22
Supplement: s1 [file s1]

## Support Information

### Structural Effects of Microcrystalline Cellulose-Derived Carbon Supports on Catalytic Performance of the Pd(OH)<sub>2</sub>/C Catalysts for the Hydrogenolytic Debenzylation of Hexanitrohexaazaisowurtzitane Derivatives

Yuling Wang <sup>1</sup>, Yun Chen <sup>2</sup>, Xinlei Ding <sup>1</sup>, Jianwei Song <sup>3</sup>, Gaixia Wei <sup>3</sup>, Hengwei Dai <sup>1</sup>,  
Hanyang Wang <sup>1</sup>, Yadong Liu <sup>1</sup>, Guangmei Bai <sup>1</sup> and Wenge Qiu <sup>1,\*</sup>

#### Additional Figures and Data

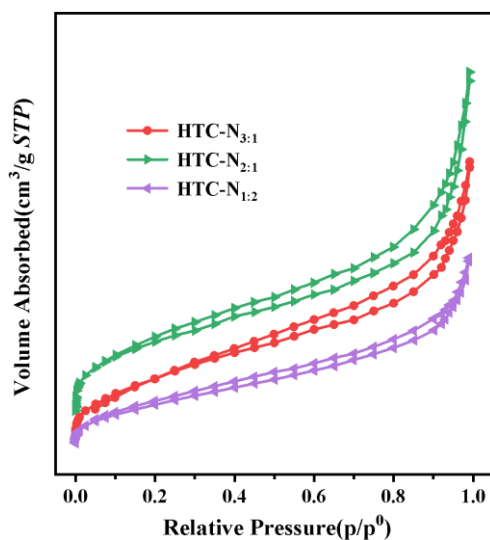

**Figure S1.** N<sub>2</sub> adsorption-desorption isotherms of the HTC-N<sub>3:1</sub>, HTC-N<sub>2:1</sub>, HTC-N<sub>1:2</sub> samples.

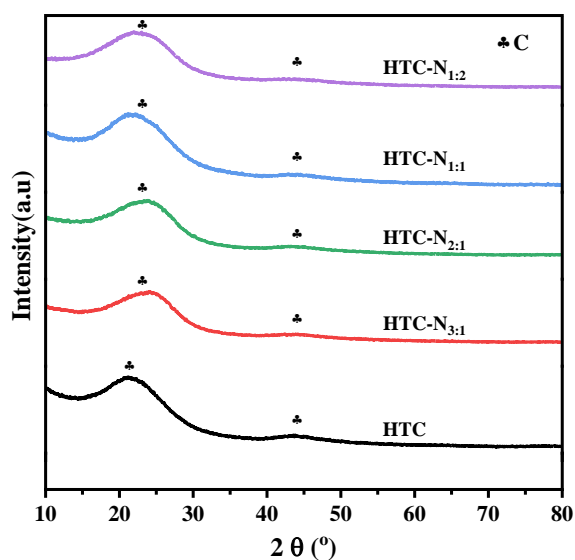

**Figure S2.** XRD patterns of the carbon supports.

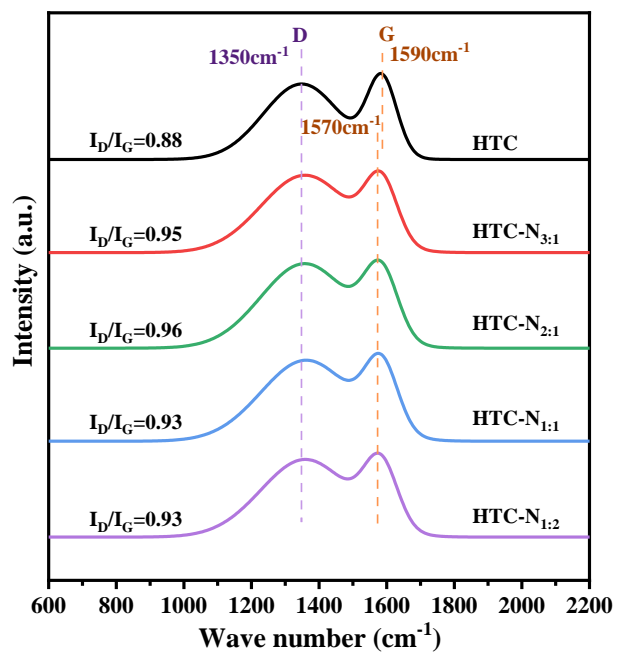

**Figure S3.** Raman spectra of the carbon supports.

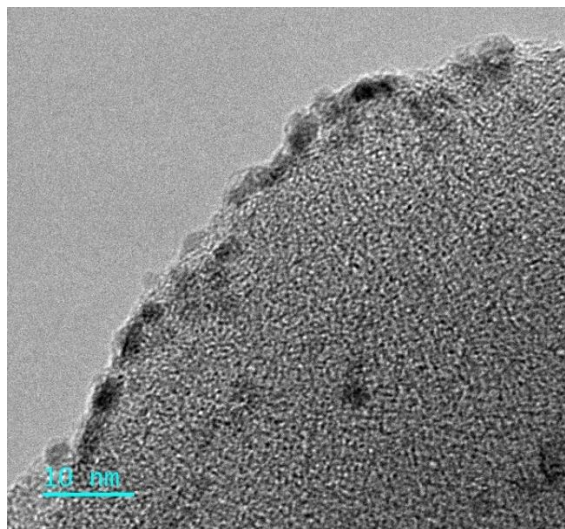

**Figure S4.** TEM bright field image of Pd/HTC-N1:1.

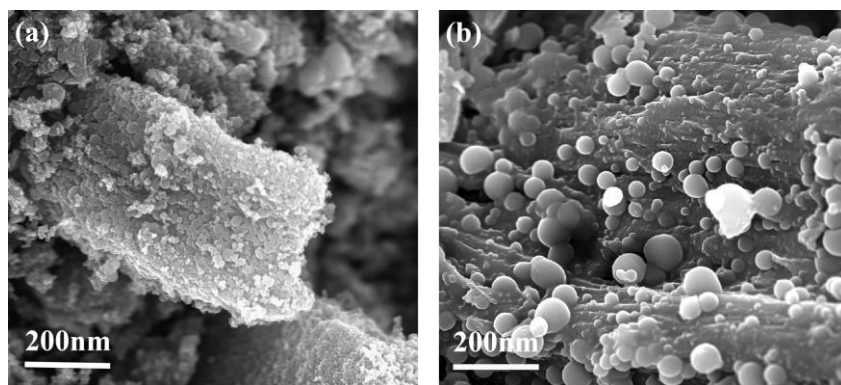

**Figure S5.** SEM images of the recovered Pd/HTC(a) and Pd/HTC-N<sub>1:1</sub>(b) samples after three cycles in the hydrogenolysis reaction of TADB.

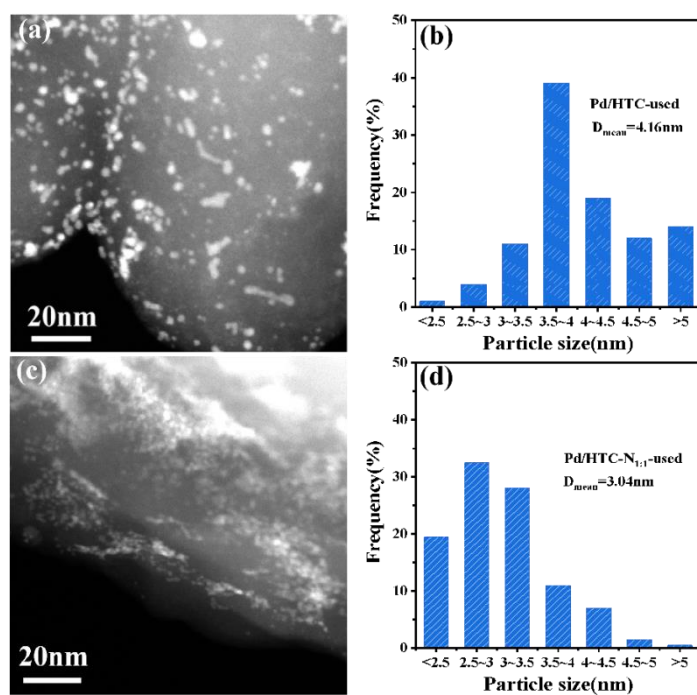

**Figure S6.** STEM images and the Pd particle size distributions of Pd/HTC (a and b) and Pd/HTC-N<sub>1:1</sub> (c and d) after three cycles in the hydrogenolysis reaction of TADB.

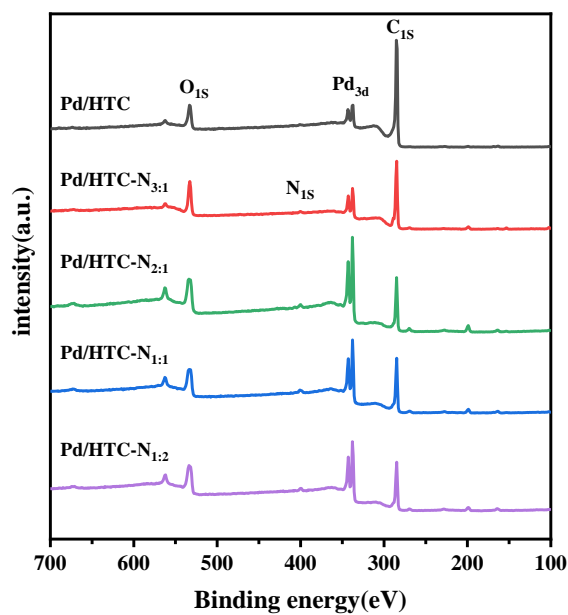

**Figure S7.** XPS survey spectrum of various catalysts: Pd/HTC, Pd/HTC-N<sub>3:1</sub>, Pd/HTC-N<sub>2:1</sub>, Pd/HTC-N<sub>1:1</sub> and Pd/HTC-N<sub>1:2</sub>.

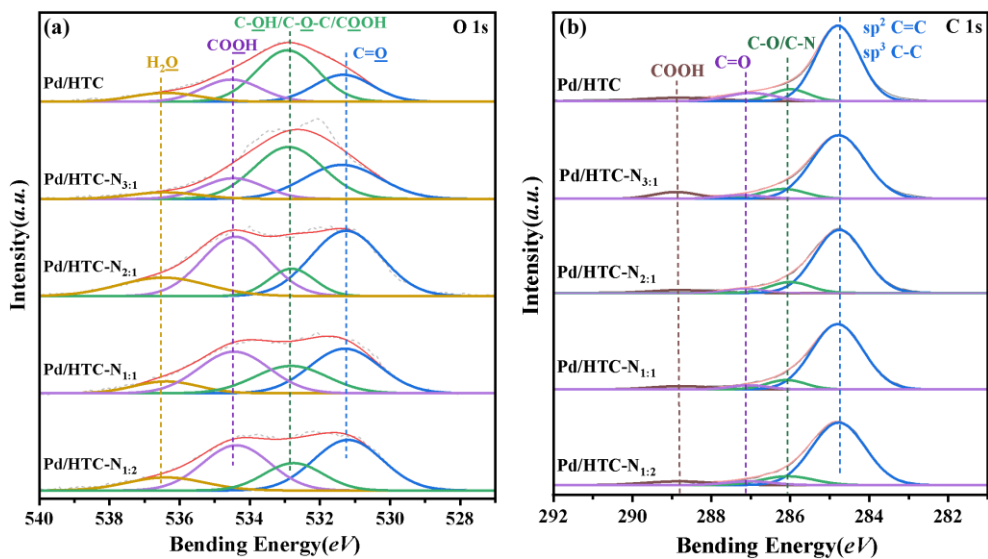

**Figure S8.** High-resolution of O 1s (a) and C 1s (b) XPS spectra of the Pd/HTC, Pd/HTC-N<sub>3:1</sub>, Pd/HTC-N<sub>2:1</sub>, Pd/HTC-N<sub>1:1</sub> and Pd/HTC-N<sub>1:2</sub> catalysts.

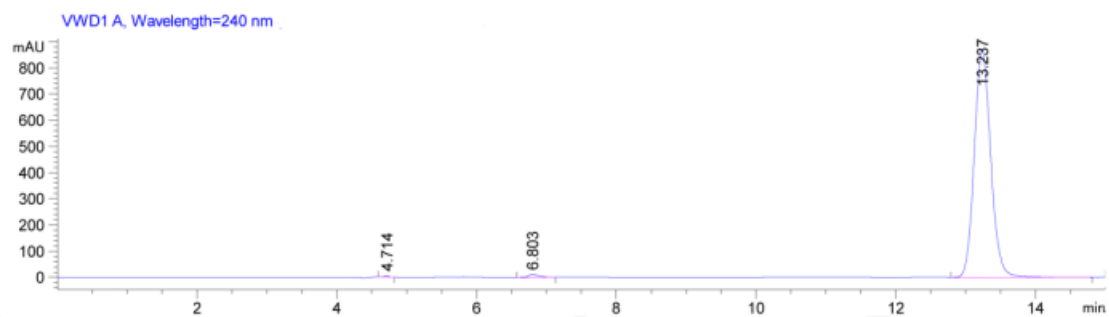

**Figure S9.** HPLC data of TADB crude product. Condition: C18 column, 70% methanol aqueous solution as mobile phase, velocity of flow 0.4mL/min.

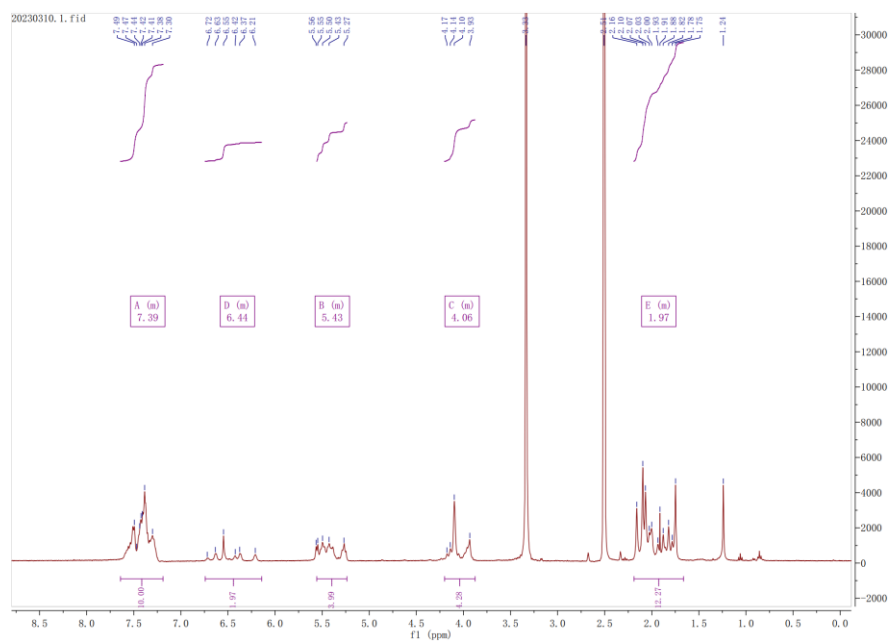

**Figure S10.**  $^1\text{H}$ -NMR figure of TADB in DMSO.

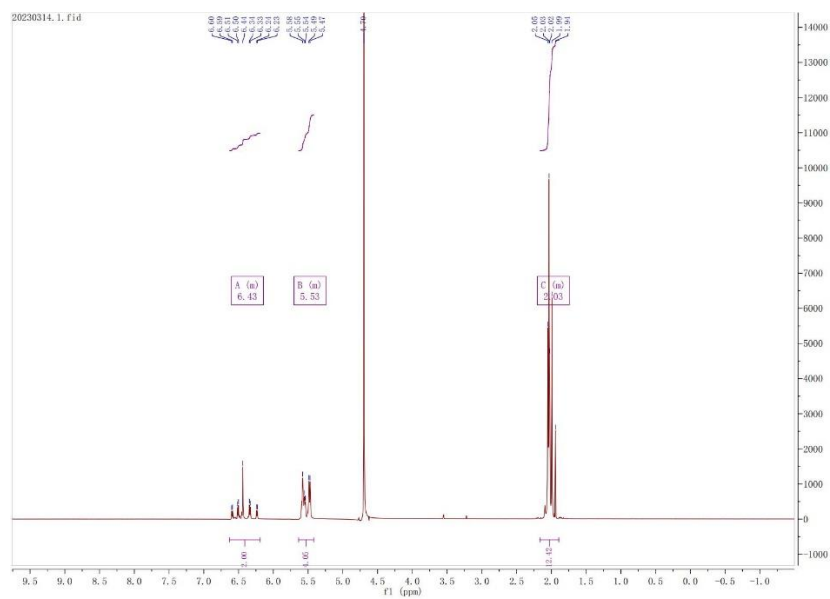

**Figure S11.**  $^1\text{H}$ -NMR figure of TAIW in  $\text{D}_2\text{O}$ .

**Table S1** Activities of Pd/HTC and Pd/HTC-N<sub>1:1</sub> in the three cycles of TADB debenzylation \*.

| Number | Catalysts               | Number of cycles | TADB conversion% |
|--------|-------------------------|------------------|------------------|
| 1      | Pd/HTC                  | Cycle-1          | 100              |
| 2      | Pd/HTC                  | Cycle-2          | 76               |
| 3      | Pd/HTC                  | Cycle-3          | 56               |
| 4      | Pd/HTC-N <sub>1:1</sub> | Cycle-1          | 100              |
| 5      | Pd/HTC-N <sub>1:1</sub> | Cycle-2          | 100              |
| 6      | Pd/HTC-N <sub>1:1</sub> | Cycle-3          | 86               |

\* The Pd dosage was 2.6 % comparing to substrate TADB.

**Table S2** Surface atomic contents of different catalysts.

| Sample               | C%    | N%   | O%    | Pd%  |
|----------------------|-------|------|-------|------|
| HTC                  | 89.15 | —    | 9.3   | 1.55 |
| HTC-N <sub>3:1</sub> | 72.34 | 2.57 | 22.26 | 2.83 |
| HTC-N <sub>2:1</sub> | 55.78 | 4.53 | 32.03 | 7.66 |
| HTC-N <sub>1:1</sub> | 62.22 | 4.66 | 27.27 | 5.85 |
| HTC-N <sub>1:2</sub> | 60.39 | 4.79 | 28.64 | 6.18 |

**Table S3** XPS binding energies of Pd species and the ratios in different catalysts.

| Samples                 | Peak position (eV) |                   |                   |                   |                   |                   | Ratio (%)       |      |                  |
|-------------------------|--------------------|-------------------|-------------------|-------------------|-------------------|-------------------|-----------------|------|------------------|
|                         | Pd <sup>0</sup>    |                   | PdO               |                   | Pd <sup>2+</sup>  |                   |                 |      |                  |
|                         | 3d <sub>5/2</sub>  | 3d <sub>3/2</sub> | 3d <sub>5/2</sub> | 3d <sub>3/2</sub> | 3d <sub>5/2</sub> | 3d <sub>3/2</sub> | Pd <sup>0</sup> | PdO  | Pd <sup>2+</sup> |
| Pd/HTC                  | 335.7              | 340.8             | 337.7             | 343.0             | 338.8             | 344.6             | 11.5            | 72.3 | 16.2             |
| Pd/HTC-N <sub>3:1</sub> | 335.8              | 340.8             | 337.3             | 342.6             | 338.7             | 344.4             | 7.8             | 72.5 | 19.7             |
| Pd/HTC-N <sub>2:1</sub> | 335.8              | 340.8             | 337.5             | 342.8             | 338.8             | 344.6             | 7.0             | 75.0 | 18.0             |
| Pd/HTC-N <sub>1:1</sub> | 335.9              | 340.7             | 337.5             | 342.7             | 338.8             | 344.6             | 5.8             | 77.6 | 16.6             |
| Pd/HTC-N <sub>1:2</sub> | 335.8              | 340.8             | 337.4             | 342.8             | 338.8             | 344.6             | 6.3             | 78.5 | 15.2             |

**Table S4** XPS binding energies of N species and the ratios in different catalysts.

| Samples                 | Peak position (eV) |         |           | Ratio (%) |         |           |
|-------------------------|--------------------|---------|-----------|-----------|---------|-----------|
|                         | N 1s               |         |           | Pyridine  | Pyrrole | Graphitic |
|                         | Pyridine           | Pyrrole | Graphitic |           |         |           |
| Pd/HTC-N <sub>3:1</sub> | 398.8              | 400.3   | 401.5     | 37.3%     | 46.7%   | 16.0%     |
| Pd/HTC-N <sub>2:1</sub> | 398.7              | 400.2   | 401.4     | 38.6%     | 44.3%   | 17.1%     |
| Pd/HTC-N <sub>1:1</sub> | 398.7              | 400.3   | 401.5     | 42.5%     | 42.4%   | 15.0%     |
| Pd/HTC-N <sub>1:2</sub> | 398.7              | 400.1   | 401.3     | 40.5%     | 41.2%   | 18.3%     |

**Table S5** Calculated surface pyridinic N contents and surface pyridinic N/Pd molar ratios.

| Sample                  | Pyridinic N<br>content (%) | Surface pyridinic N<br>content (%) | Surface N/Pd<br>ratio | Surface pyridinic<br>N/Pd ratio |
|-------------------------|----------------------------|------------------------------------|-----------------------|---------------------------------|
| Pd/HTC-N <sub>3:1</sub> | 37.3%                      | 0.96                               | 0.91                  | 0.34                            |
| Pd/HTC-N <sub>2:1</sub> | 38.6%                      | 1.75                               | 0.59                  | 0.23                            |
| Pd/HTC-N <sub>1:1</sub> | 42.5%                      | 1.98                               | 0.8                   | 0.34                            |
| Pd/HTC-N <sub>1:2</sub> | 40.5%                      | 1.94                               | 0.78                  | 0.31                            |



**Table S6** Surface atomic concentrations of the oxygen species of various catalysts.

| Samples                 | Ratio of O 1s (%) |                       |       |                  |
|-------------------------|-------------------|-----------------------|-------|------------------|
|                         | C=O               | C-OH<br>C-O-C<br>C-OH | COOH  | H <sub>2</sub> O |
|                         | 531.3             | 532.8                 | 534.5 | 536.4            |
| Pd/HTC                  | 23.7              | 47.7                  | 19.6  | 9.0              |
| Pd/HTC-N <sub>3:1</sub> | 32.8              | 45.5                  | 16.0  | 5.7              |
| Pd/HTC-N <sub>2:1</sub> | 40.1              | 10.8                  | 34.8  | 14.3             |
| Pd/HTC-N <sub>1:1</sub> | 35.5              | 22.6                  | 33.1  | 8.8              |
| Pd/HTC-N <sub>1:2</sub> | 38.1              | 17.6                  | 33.2  | 11.1             |

**Table S7** Surface atomic concentrations of the carbon species of various catalysts.

| Samples                 | Ratio of C 1s (%)                          |            |     |       |
|-------------------------|--------------------------------------------|------------|-----|-------|
|                         | Sp <sup>2</sup> C=C<br>Sp <sup>3</sup> C-C | C-O<br>C-N | C=O | COOH  |
|                         | 284.8                                      | 286        | 287 | 288.8 |
| Pd/HTC                  | 75.1                                       | 10.1       | 9.0 | 5.8   |
| Pd/HTC-N <sub>3:1</sub> | 79.2                                       | 10.2       | 3.7 | 6.9   |
| Pd/HTC-N <sub>2:1</sub> | 80.3                                       | 11.3       | 4.1 | 4.3   |
| Pd/HTC-N <sub>1:1</sub> | 82.6                                       | 8.9        | 3.7 | 4.8   |
| Pd/HTC-N <sub>1:2</sub> | 79.4                                       | 10.8       | 4.0 | 5.8   |
